# Supplementary material
Source: ML conference proceedings conference paper supplement (https://proceedings.mlr.press/v130/diakonikolas21a.html)
Supplement: Supplementary file 1 [file diakonikolas21a-supp.pdf]

## A Additional Background

**Definition A.1** (Convex conjugate). Given a convex function  $\psi : \mathbb{R}^d \rightarrow \mathbb{R} \cup \{+\infty\}$ , its convex conjugate  $\psi^*$  is defined by:

$$(\forall \mathbf{z} \in \mathbb{R}^d) : \quad \psi^*(\mathbf{z}) = \sup_{\mathbf{x} \in \mathbb{R}^d} \{\langle \mathbf{z}, \mathbf{x} \rangle - \psi(\mathbf{x})\}.$$

The following standard fact can be derived using Fenchel-Young inequality  $\forall \mathbf{x}, \mathbf{z} \in \mathbb{R}^d : \psi(\mathbf{x}) + \psi^*(\mathbf{z}) \geq \langle \mathbf{z}, \mathbf{x} \rangle$ , and it is a simple corollary of Danskin's theorem (see, e.g., Bertsekas (1971); Bertsekas et al. (2003)).

**Fact A.2.** Let  $\psi : \mathbb{R}^d \rightarrow \mathbb{R} \cup \{+\infty\}$  be a closed convex proper function and let  $\psi^*$  be its convex conjugate. Then,  $\forall \mathbf{g} \in \partial\psi^*(\mathbf{z})$ ,

$$\mathbf{g} \in \operatorname{argsup}_{\mathbf{x} \in \mathbb{R}^d} \{\langle \mathbf{z}, \mathbf{x} \rangle - \psi(\mathbf{x})\},$$

where  $\partial\psi^*(\mathbf{z})$  is the subdifferential set (the set of all subgradients) of  $\psi^*$  at point  $\mathbf{z}$ . In particular, if  $\psi^*$  is differentiable, then  $\operatorname{argsup}_{\mathbf{x} \in \mathbb{R}^d} \{\langle \mathbf{z}, \mathbf{x} \rangle - \psi(\mathbf{x})\}$  is a singleton set and  $\nabla\psi^*(\mathbf{z})$  is its only element.

**Proposition 2.3.** Given,  $\mathbf{z}, \mathbf{u} \in \mathbb{R}^d$ ,  $p \in (1, \infty)$  and  $q \in \{p, 2\}$ , let

$$\mathbf{w} = \operatorname{argmin}_{\mathbf{v} \in \mathbb{R}^d} \left\{ \langle \mathbf{z}, \mathbf{v} \rangle + \frac{1}{q} \|\mathbf{u} - \mathbf{v}\|_p^q \right\}.$$

Then, for  $p^* = \frac{p}{p-1}$ ,  $q^* = \frac{q}{q-1}$ :

$$\mathbf{w} = \mathbf{u} - \nabla \left( \frac{1}{q^*} \|\mathbf{z}\|_{p^*}^{q^*} \right) \quad \text{and} \quad \frac{1}{q} \|\mathbf{w} - \mathbf{u}\|_p^q = \frac{1}{q} \|\mathbf{z}\|_{p^*}^{q^*}.$$

*Proof.* The statements in the proposition are simple corollaries of conjugacy of the functions  $\psi(\mathbf{u}) = \frac{1}{q} \|\mathbf{u}\|_p^q$  and  $\psi^*(\mathbf{z}) = \frac{1}{q^*} \|\mathbf{z}\|_{p^*}^{q^*}$ . In particular, the first part follows from

$$\psi^*(\mathbf{z}) = \sup_{\mathbf{v} \in \mathbb{R}^d} \{\langle \mathbf{z}, \mathbf{v} \rangle - \psi(\mathbf{v})\},$$

by the definition of a convex conjugate and using that  $\frac{1}{q} \|\mathbf{u}\|_p^q$  and  $\frac{1}{q^*} \|\mathbf{z}\|_{p^*}^{q^*}$  are conjugates of each other, which are standard exercises in convex analysis for  $q \in \{p, 2\}$  (see, e.g., (Borwein and Zhu, 2004, Exercise 4.4.2) and (Boyd et al., 2004, Example 3.27)).

The second part follows by  $\nabla\psi^*(\mathbf{z}) = \operatorname{arg sup}_{\mathbf{v} \in \mathbb{R}^d} \{\langle \mathbf{z}, \mathbf{v} \rangle - \psi(\mathbf{v})\}$ , due to Fact A.2 ( $\psi$  and  $\psi^*$  are both continuously differentiable for  $p \in (1, \infty)$ ). Lastly,  $\frac{1}{q} \|\mathbf{w} - \mathbf{u}\|_p^q = \frac{1}{q} \|\mathbf{z}\|_{p^*}^{q^*}$  can be verified by setting  $\mathbf{w} = \mathbf{u} - \nabla \left( \frac{1}{q^*} \|\mathbf{z}\|_{p^*}^{q^*} \right)$ .  $\square$

**Proposition 2.4.** For any  $L > 0$ ,  $\kappa > 0$ ,  $q \geq \kappa$ ,  $t \geq 0$ , and  $\delta > 0$ ,

$$\frac{L}{\kappa} t^\kappa \leq \frac{\Lambda}{q} t^q + \frac{\delta}{2},$$

where  $\Lambda = \left( \frac{2(q-\kappa)}{\delta q \kappa} \right)^{\frac{q-\kappa}{\kappa}} L^{q/\kappa}$ .

*Proof.* The proof is based on the Fenchel-Young inequality and the conjugacy of functions  $\frac{|x|^r}{r}$  and  $\frac{|y|^s}{s}$  for  $r, s \geq 1$ ,  $\frac{1}{r} + \frac{1}{s} = 1$ , which implies  $xy \leq \frac{x^r}{r} + \frac{y^s}{s}$ ,  $\forall x, y \geq 0$ . In particular, setting  $r = q/\kappa$ ,  $s = q/(q-\kappa)$ , and  $x = t^\kappa$ , we have

$$\frac{L}{\kappa} t^\kappa \leq \frac{L t^q}{q y} + \frac{L(q-\kappa)}{q \kappa} y^{\frac{\kappa}{q-\kappa}}.$$

It remains to set  $\frac{\delta}{2} = \frac{L(q-\kappa)}{q \kappa} y^{\frac{\kappa}{q-\kappa}}$ , which, solving for  $y$ , gives  $y = \left( \frac{\delta q \kappa}{2L(q-\kappa)} \right)^{q-\kappa}$ , and verify that, under this choice,  $\Lambda = \frac{L t^q}{q y}$ .  $\square$

## B Omitted Proofs from Section 3

**Lemma 3.1.** *Let  $F : \mathbb{R}^d \rightarrow \mathbb{R}^d$  be an arbitrary  $L$ -Lipschitz operator that satisfies Assumption 1 for some  $\mathbf{u}^* \in \mathcal{U}^*$ . Given an arbitrary initial point  $\mathbf{u}_0$ , let the sequences of points  $\{\mathbf{u}_i\}_{i \geq 1}$ ,  $\{\bar{\mathbf{u}}_i\}_{i \geq 0}$  evolve according to (EG+) for some  $\beta \in (0, 1]$  and positive step sizes  $\{a_i\}_{i \geq 0}$ . Then, for any  $\gamma > 0$  and any  $k \geq 0$ , we have:*

$$\begin{aligned} h_k &\leq \frac{1}{2} \|\mathbf{u}^* - \mathbf{u}_k\|^2 - \frac{1}{2} \|\mathbf{u}^* - \mathbf{u}_{k+1}\|^2 \\ &\quad + \frac{a_k}{2} (\rho - a_k(1 - \beta)) \|F(\bar{\mathbf{u}}_k)\|^2 \\ &\quad + \frac{a_k^2}{2\beta^2} (a_k L \gamma - \beta) \|F(\mathbf{u}_k)\|^2 \\ &\quad + \frac{1}{2} \left( \frac{a_k L}{\gamma} - \beta \right) \|\bar{\mathbf{u}}_k - \mathbf{u}_{k+1}\|^2, \end{aligned} \tag{3.2}$$

where  $h_k$  is defined as in Eq. (3.1).

*Proof.* Fix any  $k \geq 0$  and write  $h_k$  equivalently as

$$\begin{aligned} h_k &= a_k \langle F(\bar{\mathbf{u}}_k), \mathbf{u}_{k+1} - \mathbf{u}^* \rangle + a_k \langle F(\mathbf{u}_k), \bar{\mathbf{u}}_k - \mathbf{u}_{k+1} \rangle \\ &\quad + a_k \langle F(\bar{\mathbf{u}}_k) - F(\mathbf{u}_k), \bar{\mathbf{u}}_k - \mathbf{u}_{k+1} \rangle + a_k \frac{\rho}{2} \|F(\bar{\mathbf{u}}_k)\|^2. \end{aligned} \tag{B.1}$$

The proof proceeds by bounding above individual terms on the right-hand side of Eq. (B.1). For the first term, the first-order optimality in the definition of  $\mathbf{u}_{k+1}$  gives:

$$a_k F(\bar{\mathbf{u}}_k) + \mathbf{u}_{k+1} - \mathbf{u}_k = \mathbf{0}.$$

Thus, we have

$$\begin{aligned} a_k \langle F(\bar{\mathbf{u}}_k), \mathbf{u}_{k+1} - \mathbf{u}^* \rangle &= - \langle \mathbf{u}_{k+1} - \mathbf{u}_k, \mathbf{u}_{k+1} - \mathbf{u}^* \rangle \\ &= \frac{1}{2} \|\mathbf{u}^* - \mathbf{u}_k\|^2 - \frac{1}{2} \|\mathbf{u}^* - \mathbf{u}_{k+1}\|^2 - \frac{1}{2} \|\mathbf{u}_k - \mathbf{u}_{k+1}\|^2. \end{aligned} \tag{B.2}$$

For the second term on the right-hand side of Eq. (B.1), the first-order optimality in the definition of  $\bar{\mathbf{u}}_k$  implies:

$$\frac{a_k}{\beta} \langle F(\mathbf{u}_k) + \bar{\mathbf{u}}_k - \mathbf{u}_k, \mathbf{u}_{k+1} - \bar{\mathbf{u}}_k \rangle = 0,$$

which, similarly as for the first term, leads to:

$$a_k \langle F(\mathbf{u}_k), \bar{\mathbf{u}}_k - \mathbf{u}_{k+1} \rangle = \frac{\beta}{2} \|\mathbf{u}_k - \mathbf{u}_{k+1}\|^2 - \frac{\beta}{2} \|\mathbf{u}_k - \bar{\mathbf{u}}_k\|^2 - \frac{\beta}{2} \|\mathbf{u}_{k+1} - \bar{\mathbf{u}}_k\|^2. \tag{B.3}$$

For the third term on the right-hand side of Eq. (B.1), applying Cauchy-Schwarz inequality,  $L$ -Lipschitzness of  $F$ , and Young's inequality, respectively, we have:

$$\begin{aligned} a_k \langle F(\bar{\mathbf{u}}_k) - F(\mathbf{u}_k), \bar{\mathbf{u}}_k - \mathbf{u}_{k+1} \rangle &\leq a_k \|F(\bar{\mathbf{u}}_k) - F(\mathbf{u}_k)\| \|\bar{\mathbf{u}}_k - \mathbf{u}_{k+1}\| \\ &\leq a_k L \|\bar{\mathbf{u}}_k - \mathbf{u}_k\| \|\bar{\mathbf{u}}_k - \mathbf{u}_{k+1}\| \\ &\leq \frac{a_k L \gamma}{2} \|\bar{\mathbf{u}}_k - \mathbf{u}_k\|^2 + \frac{a_k L}{2\gamma} \|\bar{\mathbf{u}}_k - \mathbf{u}_{k+1}\|^2, \end{aligned} \tag{B.4}$$

where the last inequality holds for any  $\gamma > 0$ .

Using that  $\bar{\mathbf{u}}_k - \mathbf{u}_k = -\frac{a_k}{\beta} F(\mathbf{u}_k)$ ,  $\mathbf{u}_{k+1} - \mathbf{u}_k = -a_k F(\bar{\mathbf{u}}_k)$  and combining Eqs. (B.2)-(B.4) with Eq. (B.1), we have:

$$\begin{aligned} h_k &\leq \frac{1}{2} \|\mathbf{u}^* - \mathbf{u}_k\|^2 - \frac{1}{2} \|\mathbf{u}^* - \mathbf{u}_{k+1}\|^2 + \frac{a_k}{2} (\rho - a_k(1 - \beta)) \|F(\bar{\mathbf{u}}_k)\|^2 \\ &\quad + \frac{a_k^2}{2\beta^2} (a_k L \gamma - \beta) \|F(\mathbf{u}_k)\|^2 + \frac{1}{2} \left( \frac{a_k L}{\gamma} - \beta \right) \|\bar{\mathbf{u}}_k - \mathbf{u}_{k+1}\|^2, \end{aligned}$$

as claimed.  $\square$

## C Omitted Proofs from Section 4

We start by first proving the following lemma that holds for generic choices of algorithm parameters  $a_k$  and  $\beta$ . We will then use this lemma to deduce the convergence bounds for different choices of  $p > 1$  and both the deterministic and the stochastic oracle access to  $F$ .

**Lemma C.1.** *Let  $p > 1$  and let  $F : \mathbb{R}^d \rightarrow \mathbb{R}^d$  be an arbitrary  $L$ -Lipschitz operator w.r.t.  $\|\cdot\|_p$  that satisfies Assumption 1 for some  $\mathbf{u}^* \in \mathcal{U}^*$ . Given an arbitrary initial point  $\mathbf{u}_0$ , let the sequences of points  $\{\mathbf{u}_i\}_{i \geq 1}$ ,  $\{\bar{\mathbf{u}}_i\}_{i \geq 0}$  evolve according to (EG $_{p+}$ ) for some  $\beta \in (0, 1]$  and positive step sizes  $\{a_i\}_{i \geq 0}$ . Then, for any  $\gamma > 0$  and any  $k \geq 0$ :*

$$\begin{aligned} h_k &\leq -a_k \langle \bar{\boldsymbol{\eta}}_k, \bar{\mathbf{u}}_k - \mathbf{u}^* \rangle - a_k \langle \bar{\boldsymbol{\eta}}_k - \boldsymbol{\eta}_k, \bar{\mathbf{u}}_k - \mathbf{u}_{k+1} \rangle + \frac{a_k \rho}{2} \|F(\bar{\mathbf{u}}_k)\|_{p^*}^2 \\ &\quad + \phi_p(\mathbf{u}^*, \mathbf{u}_k) - \phi_p(\mathbf{u}^*, \mathbf{u}_{k+1}) + \frac{\beta - m_p}{q} \|\mathbf{u}_{k+1} - \mathbf{u}_k\|_p^q \\ &\quad + \frac{a_k \Lambda_k \gamma - \beta}{q} \|\bar{\mathbf{u}}_k - \mathbf{u}_k\|_p^q + \frac{a_k \Lambda_k / \gamma - \beta m_p}{q} \|\bar{\mathbf{u}}_k - \mathbf{u}_{k+1}\|_p^q + a_k \delta_k, \end{aligned}$$

where  $h_k$  is defined as in Eq. (4.7),  $\delta_k$  is any positive number, and  $\Lambda_k = \left(\frac{q-2}{\delta_k q}\right)^{\frac{q-2}{2}} L^{q/2}$ . When  $q = 2$ , the statement also holds with  $\delta_k = 0$  and  $\Lambda_k = L$ .

*Proof.* We begin the proof by writing  $h_k$  equivalently as:

$$\begin{aligned} h_k &= a_k \left\langle \tilde{F}(\bar{\mathbf{u}}_k), \bar{\mathbf{u}}_k - \mathbf{u}^* \right\rangle - a_k \langle \bar{\boldsymbol{\eta}}_k, \bar{\mathbf{u}}_k - \mathbf{u}^* \rangle + \frac{a_k \rho}{2} \|F(\bar{\mathbf{u}}_k)\|_{p^*}^2 \\ &= a_k \left\langle \tilde{F}(\bar{\mathbf{u}}_k), \mathbf{u}_{k+1} - \mathbf{u}^* \right\rangle + a_k \left\langle \tilde{F}(\mathbf{u}_k), \bar{\mathbf{u}}_k - \mathbf{u}_{k+1} \right\rangle \\ &\quad + a_k \left\langle \tilde{F}(\bar{\mathbf{u}}_k) - \tilde{F}(\mathbf{u}_k), \bar{\mathbf{u}}_k - \mathbf{u}_{k+1} \right\rangle - a_k \langle \bar{\boldsymbol{\eta}}_k, \bar{\mathbf{u}}_k - \mathbf{u}^* \rangle + \frac{a_k \rho}{2} \|F(\bar{\mathbf{u}}_k)\|_{p^*}^2. \end{aligned} \tag{C.1}$$

The proof now proceeds by bounding individual terms on the right-hand side of the last equality.

Let  $M_{k+1}(\mathbf{u}) = a_k \left\langle \nabla \tilde{F}(\bar{\mathbf{u}}_k), \mathbf{u} - \mathbf{u}_k \right\rangle + \phi_p(\mathbf{u}, \mathbf{u}_k)$ , so that  $\mathbf{u}_{k+1} = \operatorname{argmin}_{\mathbf{u} \in \mathbb{R}^d} M_{k+1}(\mathbf{u})$ . By the definition of Bregman divergence of  $M_{k+1}$ :

$$M_{k+1}(\mathbf{u}^*) = M_{k+1}(\mathbf{u}_{k+1}) + \langle \nabla M_{k+1}(\mathbf{u}_{k+1}), \mathbf{u}^* - \mathbf{u}_{k+1} \rangle + D_{M_{k+1}}(\mathbf{u}^*, \mathbf{u}_{k+1}).$$

As  $\mathbf{u}_{k+1} = \operatorname{argmin}_{\mathbf{u} \in \mathbb{R}^d} M_{k+1}(\mathbf{u})$ , we have  $\nabla M_{k+1}(\mathbf{u}_{k+1}) = \mathbf{0}$ . Further,  $D_{M_{k+1}}(\mathbf{u}^*, \mathbf{u}_{k+1}) = D_{\phi_p(\cdot, \mathbf{u}_k)}(\mathbf{u}^*, \mathbf{u}_{k+1})$ . When  $p \leq 2$ ,  $\phi_p$  itself is a Bregman divergence, and we have  $D_{M_{k+1}}(\mathbf{u}^*, \mathbf{u}_{k+1}) = \phi_p(\mathbf{u}^*, \mathbf{u}_{k+1})$ . When  $p > 2$ ,  $\phi_p(\mathbf{u}, \mathbf{u}_k) = \frac{1}{p} \|\mathbf{u} - \mathbf{u}_k\|_p^p$ , and as  $\phi_p$  is  $p$ -uniformly convex with constant 1, it follows that  $D_{M_{k+1}}(\mathbf{u}^*, \mathbf{u}_{k+1}) \leq \frac{1}{p} \|\mathbf{u}^* - \mathbf{u}_{k+1}\|_p^p = \phi_p(\mathbf{u}^*, \mathbf{u}_{k+1})$ . Thus:

$$M_{k+1}(\mathbf{u}^*) \geq M_{k+1}(\mathbf{u}_{k+1}) + \phi_p(\mathbf{u}^*, \mathbf{u}_{k+1}).$$

Equivalently, applying the definition of  $M_{k+1}(\cdot)$  to the last inequality:

$$\begin{aligned} a_k \left\langle \nabla \tilde{F}(\bar{\mathbf{u}}_k), \mathbf{u}_{k+1} - \mathbf{u}^* \right\rangle &\leq \phi_p(\mathbf{u}^*, \mathbf{u}_k) - \phi_p(\mathbf{u}^*, \mathbf{u}_{k+1}) - \phi_p(\mathbf{u}_{k+1}, \mathbf{u}_k) \\ &\leq \phi_p(\mathbf{u}^*, \mathbf{u}_k) - \phi_p(\mathbf{u}^*, \mathbf{u}_{k+1}) - \frac{m_p}{q} \|\mathbf{u}_{k+1} - \mathbf{u}_k\|_p^q, \end{aligned} \tag{C.2}$$

where the last inequality follows from Eq. (4.6).

Now let  $\bar{M}_k(\mathbf{u}) = \frac{a_k}{\beta} \left\langle \tilde{F}(\mathbf{u}_k), \mathbf{u} - \mathbf{u}_k \right\rangle + \frac{1}{q} \|\mathbf{u} - \mathbf{u}_k\|_p^q$  so that  $\bar{\mathbf{u}}_k = \operatorname{argmin}_{\mathbf{u} \in \mathbb{R}^d} \bar{M}_k(\mathbf{u})$ . By similar arguments as above,

$$\begin{aligned} \bar{M}_k(\mathbf{u}_{k+1}) &= \bar{M}_k(\bar{\mathbf{u}}_k) + \langle \nabla \bar{M}_k(\bar{\mathbf{u}}_k), \mathbf{u}_{k+1} - \bar{\mathbf{u}}_k \rangle + D_{\bar{M}_k}(\mathbf{u}_{k+1}, \bar{\mathbf{u}}_k) \\ &\geq \bar{M}_k(\bar{\mathbf{u}}_k) + \frac{m_p}{q} \|\mathbf{u}_{k+1} - \bar{\mathbf{u}}_k\|_p^q, \end{aligned}$$

where the inequality is by  $\nabla \bar{M}_k(\bar{\mathbf{u}}_k) = \mathbf{0}$  and the fact that  $\frac{1}{q} \|\cdot\|_p^q$  is  $q$ -uniformly convex w.r.t.  $\|\cdot\|_p$  with constant  $m_p$ , by the choice of  $q$  from Eq. (4.3). Applying the definition of  $\bar{M}_k(\mathbf{u})$  to the last inequality:

$$a_k \left\langle \tilde{F}(\mathbf{u}_k), \bar{\mathbf{u}}_k - \mathbf{u}_{k+1} \right\rangle \leq \frac{\beta}{q} \left( \|\mathbf{u}_{k+1} - \mathbf{u}_k\|_p^q - \|\bar{\mathbf{u}}_k - \mathbf{u}_k\|_p^q - m_p \|\mathbf{u}_{k+1} - \bar{\mathbf{u}}_k\|_p^q \right). \quad (\text{C.3})$$

The remaining term to bound is  $\left\langle \tilde{F}(\bar{\mathbf{u}}_k) - \tilde{F}(\mathbf{u}_k), \bar{\mathbf{u}}_k - \mathbf{u}_{k+1} \right\rangle$ . Using the definitions of  $\bar{\boldsymbol{\eta}}_k, \boldsymbol{\eta}_k$ , we have:

$$\begin{aligned} \left\langle \tilde{F}(\bar{\mathbf{u}}_k) - \tilde{F}(\mathbf{u}_k), \bar{\mathbf{u}}_k - \mathbf{u}_{k+1} \right\rangle &= \langle F(\bar{\mathbf{u}}_k) - F(\mathbf{u}_k), \bar{\mathbf{u}}_k - \mathbf{u}_{k+1} \rangle - \langle \bar{\boldsymbol{\eta}}_k - \boldsymbol{\eta}_k, \bar{\mathbf{u}}_k - \mathbf{u}_{k+1} \rangle \\ &\stackrel{(i)}{\leq} - \langle \bar{\boldsymbol{\eta}}_k - \boldsymbol{\eta}_k, \bar{\mathbf{u}}_k - \mathbf{u}_{k+1} \rangle + \|F(\bar{\mathbf{u}}_k) - F(\mathbf{u}_k)\|_{p^*} \|\bar{\mathbf{u}}_k - \mathbf{u}_{k+1}\|_p \\ &\stackrel{(ii)}{\leq} - \langle \bar{\boldsymbol{\eta}}_k - \boldsymbol{\eta}_k, \bar{\mathbf{u}}_k - \mathbf{u}_{k+1} \rangle + L \|\bar{\mathbf{u}}_k - \mathbf{u}_k\|_p \|\bar{\mathbf{u}}_k - \mathbf{u}_{k+1}\|_p \\ &\stackrel{(iii)}{\leq} - \langle \bar{\boldsymbol{\eta}}_k - \boldsymbol{\eta}_k, \bar{\mathbf{u}}_k - \mathbf{u}_{k+1} \rangle + \frac{L\gamma}{2} \|\bar{\mathbf{u}}_k - \mathbf{u}_k\|_p^2 + \frac{L}{2\gamma} \|\bar{\mathbf{u}}_k - \mathbf{u}_{k+1}\|_p^2, \end{aligned}$$

where (i) is by Hölder's inequality, (ii) is by  $L$ -Lipschitzness of  $F$ , and (iii) is by Young's inequality, which holds for any  $\gamma > 0$ . Now, let  $\delta_k > 0$  and  $\Lambda_k = \left( \frac{2(q-\kappa)}{\delta_k q \kappa} \right)^{\frac{q-\kappa}{\kappa}} L^{q/\kappa}$ . Then, applying Proposition 2.4 to the last two terms in the last inequality:

$$\begin{aligned} \left\langle \tilde{F}(\bar{\mathbf{u}}_k) - \tilde{F}(\mathbf{u}_k), \bar{\mathbf{u}}_k - \mathbf{u}_{k+1} \right\rangle &\leq - \langle \bar{\boldsymbol{\eta}}_k - \boldsymbol{\eta}_k, \bar{\mathbf{u}}_k - \mathbf{u}_{k+1} \rangle \\ &\quad + \frac{\Lambda_k \gamma}{q} \|\bar{\mathbf{u}}_k - \mathbf{u}_k\|_p^q + \frac{\Lambda_k}{q\gamma} \|\bar{\mathbf{u}}_k - \mathbf{u}_{k+1}\|_p^q + \delta_k. \end{aligned} \quad (\text{C.4})$$

Observe that when  $q = 2$ , there is no need to apply Proposition 2.4, and the last inequality is satisfied with  $\delta_k = 0$  and  $\Lambda_k = L$ .

Combining Eqs. (C.2)-(C.4) with Eq. (C.1), we have:

$$\begin{aligned} h_k &\leq -a_k \langle \bar{\boldsymbol{\eta}}_k, \bar{\mathbf{u}}_k - \mathbf{u}^* \rangle - a_k \langle \bar{\boldsymbol{\eta}}_k - \boldsymbol{\eta}_k, \bar{\mathbf{u}}_k - \mathbf{u}_{k+1} \rangle + \frac{a_k \rho}{2} \|F(\bar{\mathbf{u}}_k)\|_{p^*}^2 \\ &\quad + \phi_p(\mathbf{u}^*, \mathbf{u}_k) - \phi_p(\mathbf{u}^*, \mathbf{u}_{k+1}) + \frac{\beta - m_p}{q} \|\mathbf{u}_{k+1} - \mathbf{u}_k\|_p^q \\ &\quad + \frac{a_k \Lambda_k \gamma - \beta}{q} \|\bar{\mathbf{u}}_k - \mathbf{u}_k\|_p^q + \frac{a_k \Lambda_k / \gamma - \beta m_p}{q} \|\bar{\mathbf{u}}_k - \mathbf{u}_{k+1}\|_p^q + a_k \delta_k, \end{aligned}$$

as claimed.  $\square$

We are now ready to state and prove the main convergence bounds. For simplicity, we first start with the case of exact oracle access to  $F$ . We then show that we can build on this result by separately bounding the error terms due to the variance of the stochastic estimates  $\tilde{F}$ .

**Deterministic Oracle Access.** The main result is summarized in the following theorem.

**Theorem 4.1.** *Let  $p > 1$  and let  $F : \mathbb{R}^d \rightarrow \mathbb{R}^d$  be an arbitrary  $L$ -Lipschitz operator w.r.t.  $\|\cdot\|_p$  that satisfies Assumption 1 with  $\rho = 0$  for some  $\mathbf{u}^* \in \mathcal{U}^*$ . Assume that we are given oracle access to the exact evaluations of  $F$ , i.e.,  $\bar{\boldsymbol{\eta}}_i = \boldsymbol{\eta}_i = \mathbf{0}, \forall i$ . Given an arbitrary initial point  $\mathbf{u}_0 \in \mathbb{R}^d$ , let the sequences of points  $\{\mathbf{u}_i\}_{i \geq 1}, \{\bar{\mathbf{u}}_i\}_{i \geq 0}$  evolve according to (EG<sub>p</sub>+) for  $\beta \in (0, 1]$  and step sizes  $\{a_i\}_{i \geq 0}$  specified below. Then, we have:*

(i) *Let  $p \in (1, 2]$ . If  $\beta = m_p = p - 1$ ,  $a_k = \frac{m_p^{3/2}}{2L}$ , then all accumulation points of  $\{\mathbf{u}_k\}_{k \geq 0}$  are in  $\mathcal{U}^*$ , and, furthermore  $\forall k \geq 0$ :*

$$\begin{aligned} \frac{1}{k+1} \sum_{i=0}^k \|F(\mathbf{u}_i)\|_{p^*}^2 &\leq \frac{16L^2 \phi_p(\mathbf{u}^*, \mathbf{u}_0)}{m_p^2 (k+1)} \\ &= O\left( \frac{L^2 \|\mathbf{u}^* - \mathbf{u}_0\|_p^2}{(p-1)^2 (k+1)} \right). \end{aligned}$$

In particular, within  $k = O\left(\frac{L^2\|\mathbf{u}^* - \mathbf{u}_0\|_p^2}{(p-1)^2\epsilon^2}\right)$  iterations  $\text{EG}_p+$  can output a point  $\mathbf{u}$  with  $\|F(\mathbf{u})\|_{p^*} \leq \epsilon$ .

(ii) Let  $p \in (2, \infty)$ . If  $\beta = \frac{1}{2}$ ,  $\delta_k = \delta > 0$ ,  $\Lambda = \left(\frac{q-2}{\delta q}\right)^{\frac{q-2}{2}} L^{q/2}$ , and  $a_k = \frac{1}{2\Lambda} = a$ , then,  $\forall k \geq 0$ :

$$\frac{1}{k+1} \sum_{i=0}^k \|F(\bar{\mathbf{u}}_i)\|_{p^*}^p \leq \frac{2\|\mathbf{u}^* - \mathbf{u}_0\|_p^p}{a^{p^*}(k+1)} + \frac{2p\delta}{a^{p^*-1}}.$$

In particular, for any  $\epsilon > 0$ , there is a choice of  $\delta = \frac{\epsilon^2}{C_p L}$ , where  $C_p$  is a constant that only depends on  $p$ , such that  $\text{EG}_p+$  can output a point  $\mathbf{u}$  with  $\|F(\mathbf{u})\|_{p^*} \leq \epsilon$  in at most

$$k = O_p\left(\left(\frac{L\|\mathbf{u}^* - \mathbf{u}_0\|_p}{\epsilon}\right)^p\right)$$

iterations. Here, the  $O_p$  notation hides constants that only depend on  $p$ .

*Proof.* Observe that, as  $\bar{\boldsymbol{\eta}}_i = \boldsymbol{\eta}_i = \mathbf{0}$ ,  $\forall i \geq 0$  and  $\rho = 0$ , Lemma C.1 and the definition of  $h_k$  give:

$$\begin{aligned} 0 \leq h_k &\leq \phi_p(\mathbf{u}^*, \mathbf{u}_k) - \phi_p(\mathbf{u}^*, \mathbf{u}_{k+1}) + \frac{\beta - m_p}{q} \|\mathbf{u}_{k+1} - \mathbf{u}_k\|_p^q \\ &\quad + \frac{a_k \Lambda_k \gamma - \beta}{q} \|\bar{\mathbf{u}}_k - \mathbf{u}_k\|_p^q + \frac{a_k \Lambda_k / \gamma - \beta m_p}{q} \|\bar{\mathbf{u}}_k - \mathbf{u}_{k+1}\|_p^q + a_k \delta_k, \end{aligned} \quad (\text{C.5})$$

**Proof of Part (i).** In this case, we can set  $\delta_k = 0$  (see Lemma C.1),  $\Lambda_k = L$ , and  $q = 2$ . Therefore, setting  $\beta = m_p$ ,  $a_k = \frac{m_p^{3/2}}{2L}$ , and  $\gamma = \frac{1}{\sqrt{m_p}}$  we get from Eq. (C.5) that

$$\phi_p(\mathbf{u}^*, \mathbf{u}_{k+1}) \leq \phi_p(\mathbf{u}^*, \mathbf{u}_k) - \frac{m_p}{4} \|\bar{\mathbf{u}}_k - \mathbf{u}_k\|_p^2. \quad (\text{C.6})$$

It follows that  $\|\bar{\mathbf{u}}_k - \mathbf{u}_k\|_p^2$  converges to zero as  $k \rightarrow \infty$ . By the definition of  $\bar{\mathbf{u}}_k$  and Proposition 2.3,  $\frac{1}{2} \|\bar{\mathbf{u}}_k - \mathbf{u}_k\|_p^2 = \frac{a_k^2}{2\beta^2} \|F(\mathbf{u}_k)\|_{p^*}^2$ , and, so,  $\|F(\mathbf{u}_k)\|_{p^*}$  converges to zero as  $k \rightarrow \infty$ . Further, as  $\phi_p(\mathbf{u}^*, \mathbf{u}_k) \leq \phi_p(\mathbf{u}^*, \mathbf{u}_0) < \infty$  and  $\phi_p(\mathbf{u}^*, \mathbf{u}_k) \geq \frac{m_p}{2} \|\mathbf{u}^* - \mathbf{u}_k\|_p^2$ ,  $m_p > 0$ , it follows that  $\|\mathbf{u}^* - \mathbf{u}_k\|_p$  is bounded, and, thus,  $\{\mathbf{u}_k\}_{k \geq 0}$  is a bounded sequence. The proof that all accumulation points of  $\{\mathbf{u}_k\}_{k \geq 0}$  are in  $\mathcal{U}^*$  is standard and omitted (see the proof of Theorem 3.2 for a similar argument).

To bound  $\frac{1}{k+1} \sum_{i=0}^k \|F(\mathbf{u}_i)\|_{p^*}^2$ , we telescope the inequality from Eq. (C.6) to get:

$$m_p \sum_{i=0}^k \|\bar{\mathbf{u}}_i - \mathbf{u}_i\|_p^2 \leq 4(\phi_p(\mathbf{u}^*, \mathbf{u}_0) - \phi_p(\mathbf{u}^*, \mathbf{u}_{k+1})) \leq 4\phi_p(\mathbf{u}^*, \mathbf{u}_0).$$

To complete the proof of this part, it remains to use that  $\|\bar{\mathbf{u}}_i - \mathbf{u}_i\|_p^2 = \frac{a_k^2}{\beta^2} \|F(\mathbf{u}_i)\|_{p^*}^2$  (already argued above), the definitions of  $a_k$  and  $\beta$ , and  $m_p = p - 1$ . The bound on  $\phi_p(\mathbf{u}^*, \mathbf{u}_0)$  follows from the definition of  $\phi_p$  in this case. In particular, if we denote  $\psi(\mathbf{u}) = \frac{1}{2} \|\mathbf{u} - \mathbf{u}_0\|_p^2$ , then  $\phi_p(\mathbf{u}^*, \mathbf{u}_0) = D\psi(\mathbf{u}^*, \mathbf{u}_0)$ . Using the definition of Bregman divergence and the fact that, for this choice of  $\psi$ , we have  $\|\nabla\psi(\mathbf{u})\|_{p^*} = \|\mathbf{u} - \mathbf{u}_0\|_p$ ,  $\forall \mathbf{u} \in \mathbb{R}^d$ , (see the last part of Proposition 2.3) it follows that:

$$\phi_p(\mathbf{u}^*, \mathbf{u}_0) = \frac{1}{2} \|\mathbf{u}^* - \mathbf{u}_0\|_p^2 - \frac{1}{2} \|\mathbf{u}_0 - \mathbf{u}_0\|_p^2 - \left\langle \nabla_{\mathbf{u}} \left( \frac{1}{2} \|\mathbf{u} - \mathbf{u}_0\|_p^2 \right) \Big|_{\mathbf{u}=\mathbf{u}_0}, \mathbf{u}^* - \mathbf{u}_0 \right\rangle = \frac{1}{2} \|\mathbf{u}^* - \mathbf{u}_0\|_p^2.$$

**Proof of Part (ii).** In this case,  $q = p$ ,  $\phi_p(\mathbf{u}, \mathbf{v}) = \frac{1}{p} \|\mathbf{u} - \mathbf{v}\|_p^p$ , and  $m_p = 1$ . Using Proposition 2.3,  $\|\mathbf{u}_k - \bar{\mathbf{u}}_k\|_p^p = \frac{a_k^{p^*}}{\beta^{p^*}} \|F(\mathbf{u}_k)\|_{p^*}^{p^*}$  and  $\|\mathbf{u}_{k+1} - \mathbf{u}_k\|_p^p = a_k^{p^*} \|F(\bar{\mathbf{u}}_k)\|_{p^*}^{p^*}$ . Combining with Eq. (C.5), we have:

$$\begin{aligned} 0 \leq \frac{1}{p} \|\mathbf{u}^* - \mathbf{u}_k\|_p^p - \frac{1}{p} \|\mathbf{u}^* - \mathbf{u}_{k+1}\|_p^p &+ \frac{(\beta - 1)a_k^{p^*}}{p} \|F(\bar{\mathbf{u}}_k)\|_{p^*}^{p^*} \\ &+ \frac{(a_k \Lambda_k \gamma - \beta)a_k^{p^*}}{p\beta^{p^*}} \|F(\mathbf{u}_k)\|_{p^*}^{p^*} + \frac{a_k \Lambda_k / \gamma - \beta}{p} \|\bar{\mathbf{u}}_k - \mathbf{u}_{k+1}\|_p^p + a_k \delta_k. \end{aligned} \quad (\text{C.7})$$

Now let  $\gamma = 1$ ,  $\beta = \frac{1}{2}$ ,  $\delta_k = \delta > 0$ , and  $a_k = \frac{1}{2\Lambda_k} = \frac{1}{2\Lambda} = a$ . Then  $a_k\Lambda_k\gamma - \beta = a_k\Lambda_k/\gamma - \beta = 0$  and Eq. (C.7) simplifies to:

$$\frac{a^{p^*}}{2p} \|F(\bar{\mathbf{u}}_k)\|_{p^*}^{p^*} \leq \frac{1}{p} \|\mathbf{u}^* - \mathbf{u}_k\|_p^p - \frac{1}{p} \|\mathbf{u}^* - \mathbf{u}_{k+1}\|_p^p + a\delta.$$

Telescoping the last inequality and then dividing it by  $\frac{a^{p^*}(k+1)}{2p}$ , we have:

$$\frac{1}{k+1} \sum_{i=0}^k \|F(\bar{\mathbf{u}}_i)\|_{p^*}^{p^*} \leq \frac{2\|\mathbf{u}^* - \mathbf{u}_0\|_p^p}{a^{p^*}(k+1)} + \frac{2p\delta}{a^{p^*-1}}. \quad (\text{C.8})$$

Now, for  $\text{EG}_p+$  to be able to output a point  $\mathbf{u}$  with  $\|F(\mathbf{u})\|_{p^*} \leq \epsilon$ , it suffices to show that for some choice of  $\delta$  and  $k$  we can make the right-hand side of Eq. (C.8) at most  $\epsilon^{p^*}$ . This is true because then  $\text{EG}_p+$  can output the point  $\bar{\mathbf{u}}_i = \operatorname{argmin}_{0 \leq i \leq k} \|F(\bar{\mathbf{u}}_i)\|_{p^*}$ . For stochastic setups, the guarantee would be in expectation, and  $\text{EG}_p+$  could output a point  $\bar{\mathbf{u}}_i$  with  $i$  chosen uniformly at random from  $\{0, \dots, k\}$ , similarly as discussed in the proof of Theorem 3.2.

Observe first that, as  $\Lambda = \left(\frac{p-2}{p\delta}\right)^{\frac{p-2}{2}} L^{p/2}$  and  $p^* = \frac{p}{p-1}$ , we have that:

$$\begin{aligned} \frac{\delta}{a^{p^*-1}} &= \delta(2\Lambda)^{p^*-1} = \delta 2^{\frac{1}{p-1}} \Lambda^{\frac{1}{p-1}} \\ &= 2^{\frac{1}{p-1}} \delta^{\frac{p}{2(p-1)}} \left(\frac{p-2}{p}\right)^{\frac{p-2}{2(p-1)}} L^{\frac{p}{2(p-1)}}. \end{aligned}$$

Setting  $\frac{2p\delta}{a^{p^*-1}} \leq \frac{\epsilon^{p^*}}{2}$ , recalling that  $p^* = \frac{p}{p-1}$ , and rearranging, we have:

$$\delta^{\frac{p^*}{2}} \leq \frac{\epsilon^{p^*}}{2^{\frac{2p-1}{p}} p} \left(\frac{p}{p-2}\right)^{\frac{p-2}{2p} p^*} L^{-p^*/2}.$$

Equivalently:

$$\delta \leq \frac{\epsilon^2}{L \cdot 2^{\frac{2(2p-1)}{p}} p^{\frac{2(p-1)}{p}} \left(\frac{p-2}{p}\right)^{\frac{p-2}{p}}}.$$

It can be verified numerically that  $\left(\frac{p-2}{p}\right)^{\frac{p-2}{p}}$  is a constant between  $\frac{1}{e}$  and 1, while it is clear that  $2^{\frac{2(2p-1)}{p}} p^{\frac{2(p-1)}{p}} = O(p^2)$  is a constant that only depends on  $p$ . Hence, it suffices to set  $\delta = \frac{\epsilon^2}{C_p L}$ , where  $C_p = 2^{\frac{2(2p-1)}{p}} p^{\frac{2(p-1)}{p}}$ .

It remains to bound the number of iterations  $k$  so that  $\frac{2\|\mathbf{u}^* - \mathbf{u}_0\|_p^p}{a^{p^*}(k+1)} \leq \frac{\epsilon^{p^*}}{2}$ . Equivalently, we need  $k+1 \geq \frac{4\|\mathbf{u}^* - \mathbf{u}_0\|_p^p}{a^{p^*} \epsilon^{p^*}}$ . Plugging  $\delta = \frac{\epsilon^2}{C_p L}$  into the definition of  $\Lambda$ , using that  $p^* = \frac{p}{p-1}$ , and simplifying, we have:

$$\begin{aligned} a^{p^*} &= (2\Lambda)^{p^*} = 2^{\frac{p}{p-1}} \left(\frac{p-2}{p\delta}\right)^{\frac{p-2}{2} \cdot \frac{p}{p-1}} L^{\frac{p}{2} \cdot \frac{p}{p-1}} \\ &= O_p\left(\left(\frac{1}{\epsilon}\right)^{\frac{p(p-2)}{p-1}} L^p\right). \end{aligned}$$

Thus,

$$k = O_p\left(\left(\frac{1}{\epsilon}\right)^{\frac{p(p-2)}{p-1} + \frac{p}{p-1}} L^p \|\mathbf{u}^* - \mathbf{u}_0\|_p^p\right) = O_p\left(\left(\frac{L\|\mathbf{u}^* - \mathbf{u}_0\|_p}{\epsilon}\right)^p\right),$$

as claimed.  $\square$

**Stochastic Oracle Access.** To obtain results for stochastic oracle access to  $F$ , we only need to bound the terms  $\mathcal{E}^s \stackrel{\text{def}}{=} -a_k \langle \bar{\boldsymbol{\eta}}_k, \bar{\mathbf{u}}_k - \mathbf{u}^* \rangle - a_k \langle \bar{\boldsymbol{\eta}}_k - \boldsymbol{\eta}_k, \bar{\mathbf{u}}_k - \mathbf{u}_{k+1} \rangle$  from Lemma C.1 corresponding to the stochastic error in expectation, while for the rest of the analysis we can appeal to the results for the deterministic oracle access

to  $F$ . In the case of  $p = 2$ , there is one additional term that appears in  $h_k$  due to replacing  $F(\bar{\mathbf{u}}_k)$  with  $\tilde{F}(\bar{\mathbf{u}}_k)$ . This term is simply equal to:

$$\frac{a_k \rho}{2} \mathbb{E}[\|\tilde{F}(\bar{\mathbf{u}}_k)\|_2^2 - \|F(\bar{\mathbf{u}}_k)\|_2^2 | \bar{\mathcal{F}}_k] = \frac{a_k \rho}{2} \mathbb{E}[\|F(\bar{\mathbf{u}}_k) + \bar{\boldsymbol{\eta}}_k\|_2^2 - \|F(\bar{\mathbf{u}}_k)\|_2^2 | \bar{\mathcal{F}}_k] = \frac{a_k \rho}{2} \bar{\sigma}_k^2. \quad (\text{C.9})$$

We start by bounding the stochastic error  $\mathcal{E}^s$  in expectation.

**Lemma 4.3.** *Let  $\mathcal{E}^s = -a_k \langle \bar{\boldsymbol{\eta}}_k, \bar{\mathbf{u}}_k - \mathbf{u}^* \rangle - a_k \langle \bar{\boldsymbol{\eta}}_k - \boldsymbol{\eta}_k, \bar{\mathbf{u}}_k - \mathbf{u}_{k+1} \rangle$ , where  $\bar{\boldsymbol{\eta}}_k$  and  $\boldsymbol{\eta}_k$  are defined as in Eq. (4.2) and all the assumptions of Theorem 4.4 below apply. Then, for  $q$  defined by Eq. (4.3) and any  $\tau > 0$ :*

$$\mathbb{E}[\mathcal{E}^s] \leq \frac{2^{q^*/2} a_k q^* (\sigma_k^2 + \bar{\sigma}_k^2)^{q^*/2}}{q^* \tau^{q^*}} + \mathbb{E}\left[\frac{\tau^q}{q} \|\bar{\mathbf{u}}_k - \mathbf{u}_{k+1}\|_p^q\right],$$

where the expectation is w.r.t. all the randomness in the algorithm.

*Proof.* Let us start by bounding  $-a_k \langle \bar{\boldsymbol{\eta}}_k, \bar{\mathbf{u}}_k - \mathbf{u}^* \rangle$  first. Conditioning on  $\bar{\mathcal{F}}_k$ ,  $\bar{\boldsymbol{\eta}}_k$  is independent of  $\bar{\mathbf{u}}_k$  and  $\mathbf{u}^*$ , and, thus:

$$\mathbb{E}[-a_k \langle \bar{\boldsymbol{\eta}}_k, \bar{\mathbf{u}}_k - \mathbf{u}^* \rangle] = \mathbb{E}[\mathbb{E}[-a_k \langle \bar{\boldsymbol{\eta}}_k, \bar{\mathbf{u}}_k - \mathbf{u}^* \rangle | \bar{\mathcal{F}}_k]] = 0.$$

The second term,  $-a_k \langle \bar{\boldsymbol{\eta}}_k - \boldsymbol{\eta}_k, \bar{\mathbf{u}}_k - \mathbf{u}_{k+1} \rangle$ , can be bounded using Hölder's inequality and Young's inequality as follows:

$$\begin{aligned} \mathbb{E}[-a_k \langle \bar{\boldsymbol{\eta}}_k - \boldsymbol{\eta}_k, \bar{\mathbf{u}}_k - \mathbf{u}_{k+1} \rangle] &\leq \mathbb{E}[a_k \|\bar{\boldsymbol{\eta}}_k - \boldsymbol{\eta}_k\|_{p^*} \|\bar{\mathbf{u}}_k - \mathbf{u}_{k+1}\|_p] \\ &\leq \mathbb{E}\left[\frac{a_k q^* \|\bar{\boldsymbol{\eta}}_k - \boldsymbol{\eta}_k\|_{p^*}^{q^*}}{q^* \tau^{q^*}}\right] + \mathbb{E}\left[\frac{\tau^q}{q} \|\bar{\mathbf{u}}_k - \mathbf{u}_{k+1}\|_p^q\right]. \end{aligned}$$

It remains to bound  $\mathbb{E}[\|\bar{\boldsymbol{\eta}}_k - \boldsymbol{\eta}_k\|_{p^*}^{q^*}]$ . Using triangle inequality,

$$\begin{aligned} \mathbb{E}[\|\bar{\boldsymbol{\eta}}_k - \boldsymbol{\eta}_k\|_{p^*}^{q^*}] &\leq \mathbb{E}[(\|\bar{\boldsymbol{\eta}}_k\|_{p^*} + \|\boldsymbol{\eta}_k\|_{p^*})^{q^*}] \\ &= \mathbb{E}[(\|\bar{\boldsymbol{\eta}}_k\|_{p^*} + \|\boldsymbol{\eta}_k\|_{p^*})^2]^{q^*/2} \\ &\leq \left(\mathbb{E}[(\|\bar{\boldsymbol{\eta}}_k\|_{p^*} + \|\boldsymbol{\eta}_k\|_{p^*})^2]\right)^{q^*/2}, \end{aligned}$$

where the last line is by Jensen's inequality, as  $q^* \in (1, 2]$ , and so  $(\cdot)^{q^*/2}$  is concave. Using Young's inequality and linearity of expectation:

$$\begin{aligned} \mathbb{E}[(\|\bar{\boldsymbol{\eta}}_k\|_{p^*} + \|\boldsymbol{\eta}_k\|_{p^*})^2] &\leq 2\left(\mathbb{E}[\|\bar{\boldsymbol{\eta}}_k\|_{p^*}^2] + \mathbb{E}[\|\boldsymbol{\eta}_k\|_{p^*}^2]\right) \\ &\leq 2(\sigma_k^2 + \bar{\sigma}_k^2). \end{aligned}$$

Putting everything together:

$$\mathbb{E}[\|\bar{\boldsymbol{\eta}}_k - \boldsymbol{\eta}_k\|_{p^*}^{q^*}] \leq 2^{q^*/2} (\sigma_k^2 + \bar{\sigma}_k^2)^{q^*/2}$$

and

$$\begin{aligned} \mathbb{E}[\mathcal{E}^s] &= \mathbb{E}[-a_k \langle \bar{\boldsymbol{\eta}}_k - \boldsymbol{\eta}_k, \bar{\mathbf{u}}_k - \mathbf{u}_{k+1} \rangle] \\ &\leq \frac{2^{q^*/2} a_k q^* (\sigma_k^2 + \bar{\sigma}_k^2)^{q^*/2}}{q^* \tau^{q^*}} + \mathbb{E}\left[\frac{\tau^q}{q} \|\bar{\mathbf{u}}_k - \mathbf{u}_{k+1}\|_p^q\right], \end{aligned}$$

as claimed.  $\square$

We are now ready to bound the total oracle complexity of  $\text{EG}_p+$  (and its special case  $\text{EG}+$ ), as follows.

**Theorem 4.4.** Let  $p > 1$  and let  $F : \mathbb{R}^d \rightarrow \mathbb{R}^d$  be an arbitrary  $L$ -Lipschitz operator w.r.t.  $\|\cdot\|_p$  that satisfies Assumption 1 for some  $\mathbf{u}^* \in \mathcal{U}^*$ . Given an arbitrary initial point  $\mathbf{u}_0 \in \mathbb{R}^d$ , let the sequences of points  $\{\mathbf{u}_i\}_{i \geq 1}$ ,  $\{\bar{\mathbf{u}}_i\}_{i \geq 0}$  evolve according to (EG<sub>p</sub>+) for some  $\beta \in (0, 1]$  and positive step sizes  $\{a_i\}_{i \geq 0}$ . Let the variance of a single query to the stochastic oracle  $\tilde{F}$  be bounded by some  $\sigma^2 < \infty$ .

(i) Let  $p = 2$  and  $\rho \in [0, \bar{\rho})$ , where  $\bar{\rho} = \frac{1}{4\sqrt{2}L}$ . If  $\beta = \frac{1}{2}$  and  $a_k = \frac{1}{2\sqrt{2}L}$ , then EG<sub>p</sub>+ can output a point  $\mathbf{u}$  with  $\mathbb{E}[\|\tilde{F}(\mathbf{u})\|_2] \leq \epsilon$  with at most

$$O\left(\frac{L\|\mathbf{u}^* - \mathbf{u}_0\|_2^2}{\epsilon^2(\bar{\rho} - \rho)}\left(1 + \frac{\sigma^2}{L\epsilon^2(\bar{\rho} - \rho)}\right)\right)$$

oracle queries to  $\tilde{F}$ .

(ii) Let  $p \in (1, 2]$  and  $\rho = 0$ . If  $a_k = \frac{m_p^{3/2}}{2L}$  and  $\beta = m_p$ , then EG<sub>p</sub>+ can output a point  $\mathbf{u}$  with  $\mathbb{E}[\|\tilde{F}(\mathbf{u})\|_{p^*}] \leq \epsilon$  with at most

$$O\left(\frac{L^2\|\mathbf{u}^* - \mathbf{u}_0\|_p^2}{m_p^2\epsilon^2}\left(1 + \frac{\sigma^2}{m_p\epsilon^2}\right)\right)$$

oracle queries to  $\tilde{F}$ , where  $m_p = p - 1$ .

(iii) Let  $p > 2$  and  $\rho = 0$ . If  $\beta = \frac{1}{2}$  and  $a_k = a = \frac{1}{4\Lambda}$ , then EG<sub>p</sub>+ can output a point  $\mathbf{u}$  with  $\mathbb{E}[\|\tilde{F}(\mathbf{u})\|_{p^*}] \leq \epsilon$  with at most

$$O_p\left(\left(\frac{L\|\mathbf{u}^* - \mathbf{u}_0\|_p}{\epsilon}\right)^p\left(1 + \left(\frac{\sigma}{\epsilon}\right)^{p^*}\right)\right)$$

oracle queries to  $\tilde{F}$ , where  $p^* = \frac{p}{p-1}$ .

*Proof.* Combining Lemmas C.1 and 4.3, we have,  $\forall k \geq 0$ :

$$\begin{aligned} 0 \leq \mathbb{E}[h_k] &\leq \frac{2^{q^*/2} a_k^{q^*} (\sigma_k^2 + \bar{\sigma}_k^2)^{q^*/2}}{q^* \tau^{q^*}} + \mathbb{E}\left[\frac{\tau^q}{q} \|\bar{\mathbf{u}}_k - \mathbf{u}_{k+1}\|_p^q\right] + \frac{a_k \rho \bar{\sigma}_k^2}{2} + \mathbb{E}\left[\frac{a_k \rho}{2} \|\tilde{F}(\bar{\mathbf{u}}_k)\|_{p^*}^2\right] \\ &+ \mathbb{E}\left[\phi_p(\mathbf{u}^*, \mathbf{u}_k) - \phi_p(\mathbf{u}^*, \mathbf{u}_{k+1}) + \frac{\beta - m_p}{q} \|\mathbf{u}_{k+1} - \mathbf{u}_k\|_p^q\right] \\ &+ \mathbb{E}\left[\frac{a_k \Lambda_k \gamma - \beta}{q} \|\bar{\mathbf{u}}_k - \mathbf{u}_k\|_p^q + \frac{a_k \Lambda_k / \gamma - \beta m_p}{q} \|\bar{\mathbf{u}}_k - \mathbf{u}_{k+1}\|_p^q + a_k \delta_k\right], \end{aligned} \quad (\text{C.10})$$

**Proof of Part (i).** In this case,  $q = 2$ ,  $m_p = 1$ ,  $\delta = 0$ ,  $\Lambda_k = L$ , and  $\phi_p(\mathbf{u}^*, \mathbf{u}) = \frac{1}{2} \|\mathbf{u}^* - \mathbf{u}\|_2^2$ , and, further,  $\mathbf{u}_{k+1} - \mathbf{u}_k = -a_k F(\bar{\mathbf{u}}_k)$ , so Eq. (C.10) simplifies to

$$\begin{aligned} 0 \leq \mathbb{E}[h_k] &\leq \frac{2a_k^2(\bar{\sigma}_k^2 + \sigma_k^2)}{2\tau^2} + \frac{a_k \rho \sigma_k^2}{2} \\ &+ \mathbb{E}\left[\frac{1}{2} \|\mathbf{u}^* - \mathbf{u}_k\|_2^2 - \frac{1}{2} \|\mathbf{u}^* - \mathbf{u}_{k+1}\|_2^2 + \frac{a_k^2(\beta - 1) + a_k \rho}{2} \|\tilde{F}(\bar{\mathbf{u}}_k)\|_2^2\right] \\ &+ \mathbb{E}\left[\frac{a_k L \gamma - \beta}{2} \|\bar{\mathbf{u}}_k - \mathbf{u}_k\|_2^2 + \frac{a_k L / \gamma - \beta + \tau^2}{2} \|\bar{\mathbf{u}}_k - \mathbf{u}_{k+1}\|_2^2\right], \end{aligned}$$

Taking  $\beta = \frac{1}{2}$ ,  $\tau^2 = \frac{1}{4}$ ,  $\gamma = \sqrt{2}$ , and  $a_k = \frac{1}{2\sqrt{2}L}$ , and recalling that  $\bar{\rho} = \frac{1}{4\sqrt{2}L}$ , we have:

$$a_k(\bar{\rho} - \rho) \mathbb{E}[\|\tilde{F}(\bar{\mathbf{u}}_k)\|_2^2] \leq \mathbb{E}[\|\mathbf{u}^* - \mathbf{u}_k\|_2^2 - \|\mathbf{u}^* - \mathbf{u}_{k+1}\|_2^2] + 4a_k^2(\sigma_k^2 + \bar{\sigma}_k^2)^2 + \frac{a_k \rho \bar{\sigma}_k^2}{2}.$$

Telescoping the last inequality and dividing both sides by  $a_k(\bar{\rho} - \rho)(k + 1)$ , we get:

$$\frac{1}{k+1} \sum_{i=0}^k \mathbb{E}[\|\tilde{F}(\bar{\mathbf{u}}_i)\|_2^2] \leq \frac{2\sqrt{2}L\|\mathbf{u}^* - \mathbf{u}_0\|_2^2}{(k+1)(\bar{\rho} - \rho)} + \frac{\sqrt{2} \sum_{i=0}^k (\sigma_i^2 + \bar{\sigma}_i^2)}{L(\bar{\rho} - \rho)(k+1)} + \frac{\rho \sum_{i=0}^k \bar{\sigma}_i^2}{2(k+1)(\bar{\rho} - \rho)}.$$



In particular, if variance of a single sample of  $\tilde{F}$  evaluated at an arbitrary point is  $\sigma^2$  and we take  $n$  samples of  $\tilde{F}$  in each iteration, then:

$$\frac{1}{k+1} \sum_{i=0}^k \mathbb{E}[\|\tilde{F}(\bar{\mathbf{u}}_i)\|_2^2] \leq \frac{2\sqrt{2}L\|\mathbf{u}^* - \mathbf{u}_0\|_2^2}{(k+1)(\bar{\rho} - \rho)} + \frac{\sigma^2(4\sqrt{2}/L + \rho)}{2n(\bar{\rho} - \rho)}.$$

To finish the proof of this part, we require that both terms on the right-hand side of the last inequality are bounded by  $\frac{\epsilon^2}{2}$ . For the first term, this leads to:

$$k = \left\lceil \frac{4\sqrt{2}L\|\mathbf{u}^* - \mathbf{u}_0\|_2^2}{\epsilon^2(\bar{\rho} - \rho)} - 1 \right\rceil = O\left(\frac{L\|\mathbf{u}^* - \mathbf{u}_0\|_2^2}{\epsilon^2(\bar{\rho} - \rho)}\right).$$

For the second term, the bound is:

$$n = \left\lceil \frac{2\sigma^2(4\sqrt{2}/L + \rho)}{\epsilon^2(\bar{\rho} - \rho)} \right\rceil = O\left(\frac{\sigma^2}{L\epsilon^2(\bar{\rho} - \rho)}\right).$$

Thus, the total number of required oracle queries to  $\tilde{F}$  is bounded by:

$$k(1+n) = O\left(\frac{L\|\mathbf{u}^* - \mathbf{u}_0\|_2^2}{\epsilon^2(\bar{\rho} - \rho)} \left(1 + \frac{\sigma^2}{L\epsilon^2(\bar{\rho} - \rho)}\right)\right).$$

As discussed before,  $\bar{\mathbf{u}}_i$  with  $i$  chosen uniformly at random from  $\{0, \dots, k\}$  will satisfy  $\|F(\bar{\mathbf{u}}_i)\|_2 \leq \epsilon$  in expectation.

**Proof of Part (ii).** In this case,  $q = 2$ ,  $m_p = p - 1$ ,  $\delta = 0$ ,  $\Lambda_k = L$ , and  $\rho = 0$ . Thus, Eq. (C.10) simplifies to:

$$\begin{aligned} 0 \leq \mathbb{E}[h_k] &\leq \frac{2a_k^2(\sigma_k^2 + \bar{\sigma}_k^2)}{2\tau^2} \\ &+ \mathbb{E}\left[\phi_p(\mathbf{u}^*, \mathbf{u}_k) - \phi_p(\mathbf{u}^*, \mathbf{u}_{k+1}) + \frac{\beta - m_p}{2}\|\mathbf{u}_{k+1} - \mathbf{u}_k\|_p^2\right] \\ &+ \mathbb{E}\left[\frac{a_k L \gamma - \beta}{2}\|\bar{\mathbf{u}}_k - \mathbf{u}_k\|_p^2 + \frac{a_k L / \gamma - \beta m_p + \tau^2}{2}\|\bar{\mathbf{u}}_k - \mathbf{u}_{k+1}\|_p^2\right]. \end{aligned}$$

In this case, the same choices for  $a_k$  and  $\beta$  as in the deterministic case suffice. In particular, let  $a_k = \frac{m_p^{3/2}}{2L}$ ,  $\beta = m_p$ ,  $\gamma = \frac{1}{\sqrt{m_p}}$ , and  $\tau^2 = \frac{m_p^2}{2}$ . Then, using that, from Proposition 2.3,  $\frac{1}{2}\|\bar{\mathbf{u}}_k - \mathbf{u}_k\|_p^2 = \frac{a_k^2}{2\beta^2}\|\tilde{F}(\mathbf{u}_k)\|_{p^*}^2$ , we have

$$\frac{a_k^2 m_p}{4\beta^2} \mathbb{E}[\|\tilde{F}(\mathbf{u}_k)\|_{p^*}^2] \leq \mathbb{E}\left[\phi_p(\mathbf{u}^*, \mathbf{u}_k) - \phi_p(\mathbf{u}^*, \mathbf{u}_{k+1})\right] + \frac{a_k^2(\sigma_k^2 + \bar{\sigma}_k^2)}{\tau}.$$

Telescoping the last inequality and dividing both sides by  $(k+1)\frac{a_k^2 m_p}{4\beta^2}$ , we have:

$$\frac{1}{k+1} \sum_{i=0}^k \mathbb{E}[\|\tilde{F}(\mathbf{u}_i)\|_{p^*}^2] \leq \frac{16L^2\phi_p(\mathbf{u}^*, \mathbf{u}_0)}{(k+1)m_p^2} + \frac{8\sum_{i=0}^k(\sigma_i^2 + \bar{\sigma}_i^2)}{(k+1)m_p}. \quad (\text{C.11})$$

Now let  $\sigma_i^2 = \bar{\sigma}_i^2 = \sigma^2/n$ , where  $\sigma^2$  is the variance of a single sample of  $\tilde{F}$  and  $n$  is the number of samples taken per iteration. Then, similarly as in Part (i), to bound the total number of samples, it suffices to bound each term on the right-hand side of Eq. (C.11) by  $\frac{\epsilon^2}{2}$ . The first term was already bounded in Theorem 4.1, and it leads to:

$$k = O\left(\frac{L^2\|\mathbf{u}^* - \mathbf{u}_0\|_p^2}{m_p^2\epsilon^2}\right).$$

For the second term, it suffices that:

$$n = O\left(\frac{\sigma^2}{m_p\epsilon^2}\right),$$

and the bound on the total number of samples follows.

**Proof of Part (iii).** In this case,  $q = p$ ,  $m_p = 1$ ,  $\rho = 0$ ,  $\phi_p(\mathbf{u}^*, \mathbf{u}) = \frac{1}{p} \|\mathbf{u}^* - \mathbf{u}\|_p^p$ , and we take  $\delta_k = \delta > 0$ ,  $\Lambda_k = \Lambda = \left(\frac{p-2}{p\delta}\right)^{\frac{p-2}{2}} L^{\frac{p}{2}}$ . Eq. (C.10) now simplifies to:

$$\begin{aligned} 0 \leq \mathbb{E}[h_k] &\leq \frac{2^{p^*/2} a_k p^* (\sigma_k^2 + \bar{\sigma}_k^2)^{p^*/2}}{p^* \tau^{p^*}} \\ &\quad + \mathbb{E} \left[ \frac{1}{p} \|\mathbf{u}^* - \mathbf{u}_k\|_p^p - \frac{1}{p} \|\mathbf{u}^* - \mathbf{u}_{k+1}\|_p^p + \frac{\beta - 1}{p} \|\mathbf{u}_{k+1} - \mathbf{u}_k\|_p^p \right] \\ &\quad + \mathbb{E} \left[ \frac{a_k \Lambda \gamma - \beta}{p} \|\bar{\mathbf{u}}_k - \mathbf{u}_k\|_p^p + \frac{a_k \Lambda / \gamma + \tau^p - \beta}{p} \|\bar{\mathbf{u}}_k - \mathbf{u}_{k+1}\|_p^p + a_k \delta \right]. \end{aligned} \quad (\text{C.12})$$

Recall that, by Proposition 2.3,  $\frac{1}{p} \|\mathbf{u}_{k+1} - \mathbf{u}_k\|_p^p = \frac{a^{p^*}}{p} \|\tilde{F}(\bar{\mathbf{u}}_k)\|_{p^*}^{p^*}$ . Let  $\beta = \frac{1}{2}$ ,  $a_k = a = \frac{1}{4\Lambda}$ ,  $\tau^p = \frac{1}{4}$ , and  $\gamma = 1$ . Then  $\beta - 1 = -\frac{1}{2}$ ,  $a_k \Lambda \gamma - \beta = -\frac{1}{4} < 0$ , and  $a_k \Lambda / \gamma + \tau^p - \beta = 0$ , and Eq. (C.12) leads to:

$$\frac{a^{p^*}}{2p} \mathbb{E} [\|\tilde{F}(\bar{\mathbf{u}}_k)\|_{p^*}^{p^*}] \leq \mathbb{E} \left[ \frac{1}{p} \|\mathbf{u}^* - \mathbf{u}_k\|_p^p - \frac{1}{p} \|\mathbf{u}^* - \mathbf{u}_{k+1}\|_p^p \right] + \frac{2^{\frac{4+p}{2(p-1)}} a^{p^*} (\sigma_k^2 + \bar{\sigma}_k^2)^{p^*/2}}{p^*} + a\delta.$$

Telescoping the last inequality and then dividing both sides by  $\frac{a^{p^*}}{2p}(k+1)$ , we have:

$$\frac{1}{k+1} \sum_{i=0}^k \mathbb{E} [\|\tilde{F}(\bar{\mathbf{u}}_i)\|_{p^*}^{p^*}] \leq \frac{2 \|\mathbf{u}^* - \mathbf{u}_0\|_p^p}{a^{p^*}(k+1)} + \frac{2^{\frac{3p+2}{2(p-1)}} p \sum_{i=0}^k (\sigma_i^2 + \bar{\sigma}_i^2)^{p^*/2}}{p^*(k+1)} + \frac{2p\delta}{a^{p^*} - 1}.$$

Now let  $\sigma^2$  be the variance of a single sample of  $\tilde{F}$  and suppose that in each iteration we take  $n$  samples to estimate  $F(\bar{\mathbf{u}}_i)$  and  $F(\mathbf{u}_i)$ . Then  $\sigma_i^2 = \bar{\sigma}_i^2 = \frac{\sigma^2}{n}$ , and the last equation simplifies to

$$\frac{1}{k+1} \sum_{i=0}^k \mathbb{E} [\|\tilde{F}(\bar{\mathbf{u}}_i)\|_{p^*}^{p^*}] \leq \frac{2 \|\mathbf{u}^* - \mathbf{u}_0\|_p^p}{a^{p^*}(k+1)} + \frac{2^{\frac{p+2}{p-1}} p \sigma^{p^*}}{p^* n} + \frac{2p\delta}{a^{p^*} - 1}.$$

To complete the proof, similarly as before, it suffices to show that we can choose  $k$  and  $n$  so that  $\frac{2p \|\mathbf{u}^* - \mathbf{u}_0\|_p^p}{a^{p^*}(k+1)} + \frac{2p\delta}{a^{p^*} - 1} \leq \frac{\epsilon^{p^*}}{2}$  and  $\frac{2^{\frac{p+2}{p-1}} p \sigma^{p^*}}{p^* n} \leq \frac{\epsilon^{p^*}}{2}$ . For the former, following the same argument as in the proof of Theorem 4.1, Part (ii), it suffices to choose  $\delta = O_p\left(\frac{\epsilon^2}{L}\right)$ , which leads to:

$$k = O_p \left( \left( \frac{L \|\mathbf{u}^* - \mathbf{u}_0\|_p}{\epsilon} \right)^p \right).$$

For the latter, it suffices to choose:

$$n = \frac{2^{\frac{p+2}{p-1} + 1} p \sigma^{p^*}}{p^* \epsilon^{p^*}} = O \left( \frac{p \sigma^{p^*}}{\epsilon^{p^*}} \right).$$

The total number of queries to the stochastic oracle is then bounded by  $k(1+n)$ .  $\square$
